# Supplementary material for: Plasma and urinary metabolomic profiles of Down syndrome correlate with alteration of mitochondrial metabolism
Source: PubMed Central journal article supplement (PMC5813015; doi:10.1038/s41598-018-20834-y), 2018-02-14
Supplement: 41598_2018_20834_MOESM3_ESM.pdf [file 41598_2018_20834_MOESM3_ESM.pdf]

## Supplementary Material

### Manuscript Title

Plasma and urinary metabolomic profiles of Down syndrome correlate with alteration of mitochondrial metabolism

### Authors

Maria Caracausi<sup>1†</sup>, Veronica Ghini<sup>2,3†</sup>, Chiara Locatelli<sup>4</sup>, Martina Mericio<sup>5</sup>, Allison Piovesan<sup>1</sup>, Francesca Antonaros<sup>1</sup>, Maria Chiara Pelleri<sup>1</sup>, Lorenza Vitale<sup>1</sup>, Rosa Anna Vacca<sup>6</sup>, Federica Bedetti<sup>5</sup>, Maria Chiara Mimmi<sup>7</sup>, Claudio Luchinat<sup>2,8</sup>, Paola Turano<sup>2,8</sup>, Pierluigi Strippoli<sup>1\*</sup> and Guido Cocchi<sup>5</sup>

† These Authors equally contributed to the work

### Affiliations

<sup>1</sup>Department of Experimental, Diagnostic and Specialty Medicine, (DIMES), Unit of Histology, Embryology and Applied Biology, University of Bologna, Via Belmeloro 8, 40126 Bologna, BO, Italy.

<sup>2</sup>CERM, Center of Magnetic Resonance, University of Florence, Via Luigi Sacconi 6, 50019 Sesto Fiorentino, Florence, Italy.

<sup>3</sup>CIRMMP, Consorzio Interuniversitario Risonanze Magnetiche Metallo Proteine, Via Luigi Sacconi 6, 50019 Sesto Fiorentino, Florence, Italy.

<sup>4</sup>Neonatology Unit, St. Orsola-Malpighi Polyclinic, Via Massarenti 9, 40138 Bologna, BO, Italy.

<sup>5</sup>Neonatology Unit, St. Orsola-Malpighi Polyclinic, Department of Medical and Surgical Sciences (DIMEC), University of Bologna, Via Massarenti 9, 40138 Bologna, BO, Italy.

<sup>6</sup>CNR Researcher, Institute of Biomembranes, Bioenergetics and Molecular Biotechnologies (IBIOM)  
Via Amendola 165/A, I-70126, Bari, Italy.

<sup>7</sup>Department of Medical and Biological Sciences, University of Udine, P.le Massimiliano Kolbe 4, 33100 Udine, Italy.

<sup>8</sup>Department of Chemistry, University of Florence, Via della Lastruccia 3, 50019 Sesto Fiorentino, Florence, Italy.

\*Corresponding Author

E-mail: pierluigi.strippoli@unibo.it

Phone: +39 0512094117

Fax: +39 0512094110

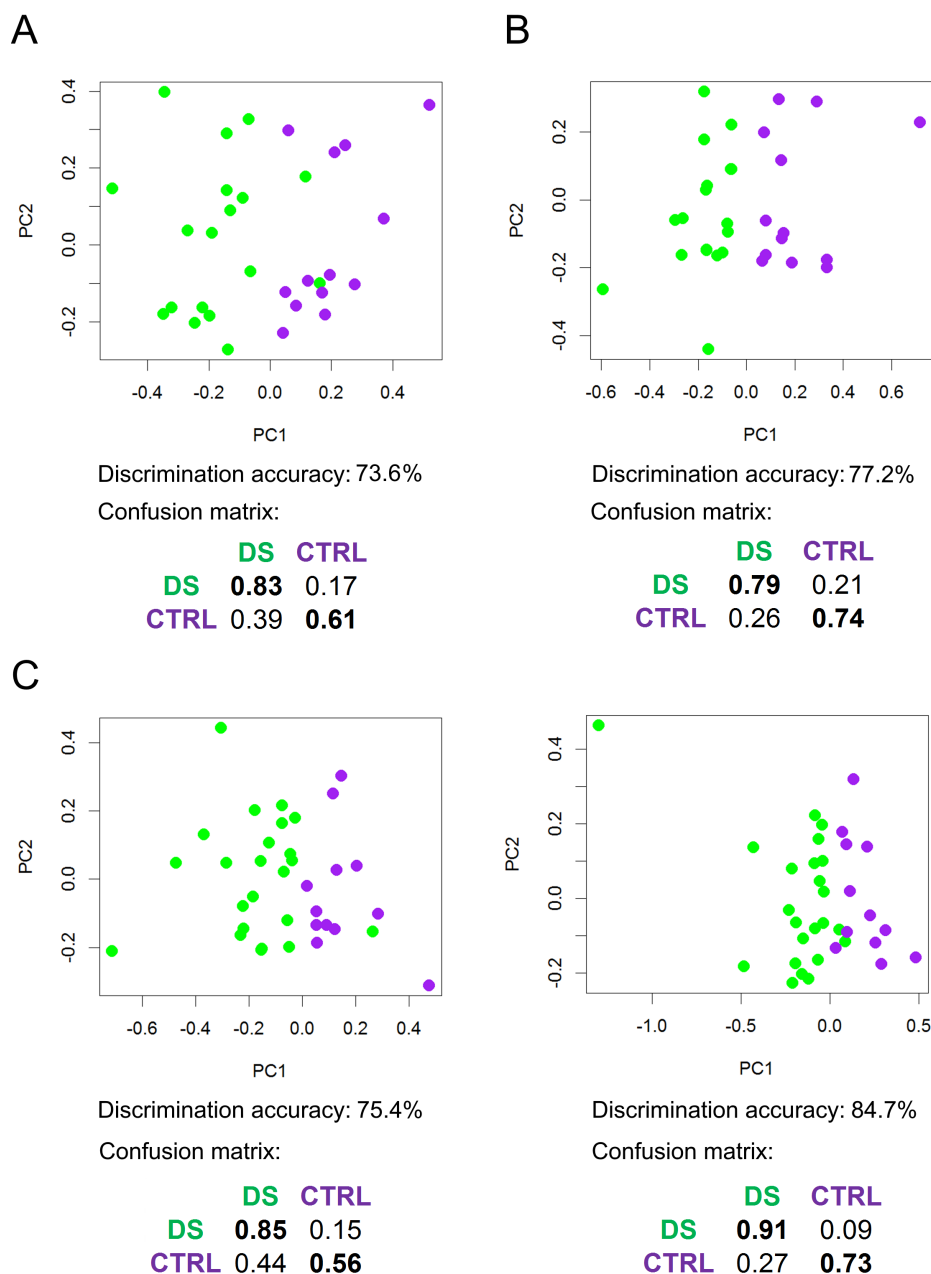

**Supplementary Figure S1. PLS-CA analysis of plasma samples by sex.** Score plot, PC1 vs. PC2, and corresponding confusion matrices. In the score plot, each dot represents a different plasma sample (all samples). Green dots: DS samples; purple dots: healthy controls. **(A)** and **(B)**: females (DS, n=18; CTRL, n=13). **(A)** 1Dpresat CPMG spectra; discrimination accuracy: 73.6% (95% CI, 72.9-74.3%); sensitivity: 82.7% (95% CI, 81.8-83.5%); specificity: 61.1% (95% CI, 59.9-62.3%). **(B)** 1Dpresat NOESY spectra; discrimination accuracy: 77.2% (95% CI, 76.5-77.9%); sensitivity: 79.2% (95% CI, 78.3-80.2%); specificity: 74.5% (95% CI, 73.5-75.5%). **(C)** and **(D)**: males (DS, n=23; CTRL, n=12). **(C)** 1Dpresat CPMG spectra; discrimination accuracy: 75.4% (95% CI, 74.7-76.1%); sensitivity: 85.4% (95% CI, 84.6-86.2%); specificity: 56.3% (95% CI, 54.9-57.6%). **(D)** 1Dpresat NOESY spectra; discrimination accuracy: 84.7% (95% CI, 84.1-85.32%); sensitivity: 90.9% (95% CI, 90.3-91.5%); specificity: 72.7% (95% CI, 71.4-74.0%).

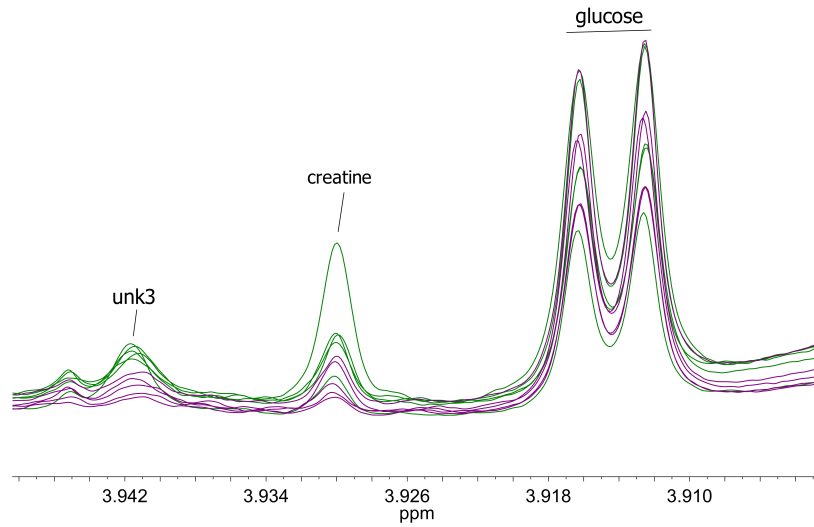

**Supplementary Figure S2. Unk3 (unknown metabolite) NMR resonance in  $^1\text{H}$  CPMG spectra.** NMR spectra from 5 DS patients (green traces) and 5 healthy control samples (purple traces), taken as example.

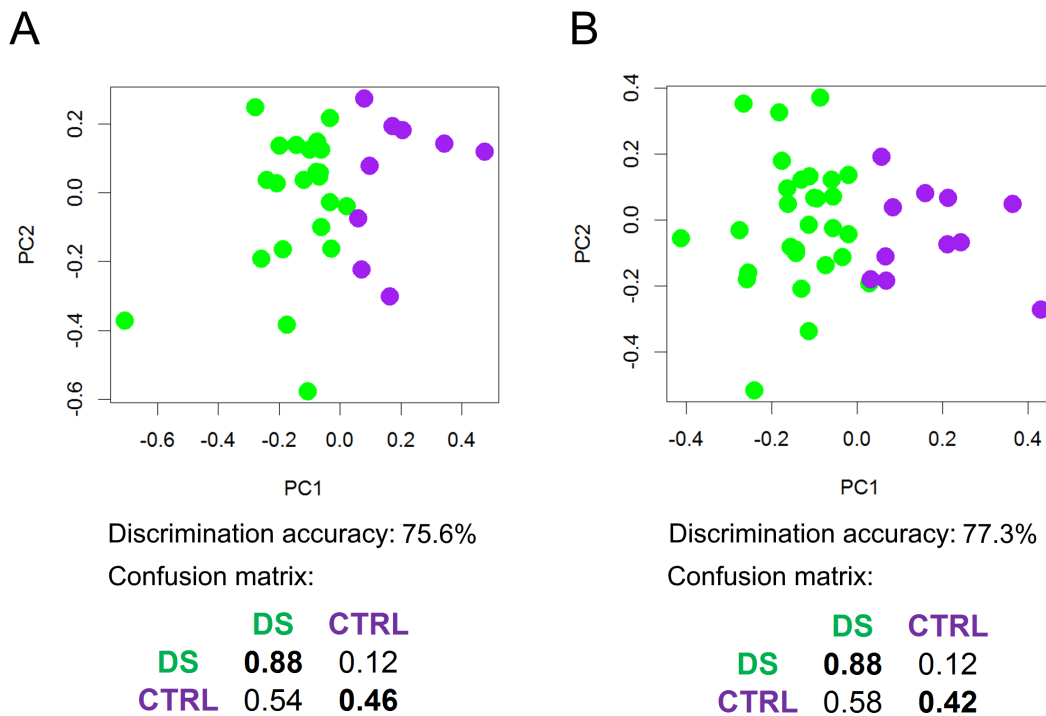

**Supplementary Figure S3. PLS-CA analysis of urine samples by sex.** Score plot, PC1 vs. PC2, and corresponding confusion matrices. In the score plot, each dot represents a different urine sample. Green dots: DS samples; purple dots: healthy controls. **(A)** Females (DS, n=22; CTRL, n=9); discrimination accuracy: 75.6% (95% CI, 74.9-76.2%); sensitivity: 87.8% (95% CI, 87.1-88.4%); specificity: 45.7% (95% CI, 44.1-47.3%). **(B)** Males (DS, n=29; CTRL, n=11); discrimination accuracy: 77.3% (95% CI, 76.6-77.9%); sensitivity: 87.6% (95% CI, 86.9-88.3%); specificity: 42.4% (95% CI, 40.6-44.1%).

**Supplementary Table S1.** List of identified metabolites in plasma samples with respective <sup>1</sup>H chemical shift values. The compound IDs derived from the Human Metabolome Database (HMDB) are provided. The multiplicity of each signal is also reported; s: singlet; d: doublet; t: triplet; dd: doublet of doublets; m: multiplet.

| Metabolite        | HMDB        | $\delta$ ( <sup>1</sup> H chemical shifts) ppm                                                      |
|-------------------|-------------|-----------------------------------------------------------------------------------------------------|
| 2-Hydroxybutyrate | HMDB0000008 | 3.99 (dd); 1.73 (m); 1.64 (m); 0.89 (t)                                                             |
| 3-Hydroxybutyrate | HMDB0000357 | 4.16 (m); 2.41 (m); 2.31 (m); 1.19 (d)                                                              |
| Acetate           | HMDB0000042 | 1.91 (s)                                                                                            |
| Acetoacetate      | HMDB0000060 | 3.44 (s); 2.27 (s)                                                                                  |
| Acetone           | HMDB0001659 | 2.22 (s)                                                                                            |
| L-Alanine         | HMDB0000161 | 3.76 (q); 1.46 (d)                                                                                  |
| Citrate           | HMDB0000094 | 2.65 (d); 2.53 (d)                                                                                  |
| Creatine          | HMDB0000064 | 3.92 (s); 3.02 (s)                                                                                  |
| Creatinine        | HMDB0000562 | 4.05 (s); 3.03 (s)                                                                                  |
| Formate           | HMDB0000142 | 8.44 (s)                                                                                            |
| Fumarate          | HMDB0000134 | 6.51 (s)                                                                                            |
| D-Glucose         | HMDB0000122 | 5.24 (d); 4.63 (d); 3.89 (dd); 3.82 (m); 3.72 (m); 3.52 (dd); 3.46 (m); 3.40 (m); 3.23 (dd)         |
| L-Glutamate       | HMDB0000148 | 3.75 (dd); 2.34 (m); 2.12 (m); 2.04 (m)                                                             |
| L-Glutamine       | HMDB0000641 | 3.77 (t); 2.45 (m); 2.12 (m)                                                                        |
| Glycerol          | HMDB0000131 | 3.77 (m); 3.64 (m); 3.55 (m)                                                                        |
| L-Glycine         | HMDB0000123 | 3.56 (s)                                                                                            |
| L-Histidine       | HMDB0000177 | 7.89 (d); 7.08 (d); 3.98 (dd); 3.23 (dd); 3.16 (dd)                                                 |
| L-Isoleucine      | HMDB0000172 | 3.66 (d); 1.97 (m); 1.46 (m); 1.25 (m); 1.00 (d); 0.93 (t)                                          |
| Lactate           | HMDB0000190 | 4.10 (q); 1.32 (d)                                                                                  |
| L-Leucine         | HMDB0000687 | 3.72 (m); 1.70 (m); 0.95 (t)                                                                        |
| L-Lysine          | HMDB0000182 | 3.74 (m); 3.02 (m); 1.89 (m); 1.71 (m); 1.46 (m)                                                    |
| D-Mannose         | HMDB0000169 | 5.17 (d); 4.89 (d); 3.92 (m); 3.88 (dd); 3.84 (m); 3.80 (m); 3.74 (m); 3.65 (m); 3.56 (t); 3.37 (m) |
| L-Methionine      | HMDB0000696 | 3.85 (dd); 2.63 (t); 2.16 (m)                                                                       |
| L-Phenylalanine   | HMDB0000159 | 7.42 (m); 7.36 (m); 7.32 (d); 3.98 (dd); 3.19 (m)                                                   |
| Pyruvate          | HMDB0000243 | 2.36 (s)                                                                                            |
| Succinate         | HMDB0000254 | 2.39 (s)                                                                                            |
| L-Threonine       | HMDB0000167 | 4.25 (m); 3.58 (d); 1.32 (d)                                                                        |
| L-Tyrosine        | HMDB0000158 | 7.17 (m); 6.88 (m); 3.92 (dd); 3.17 (dd); 3.02 (dd)                                                 |
| Unk1              | -           | 1.13 (d)                                                                                            |
| Unk2              | -           | 1.43 (d)                                                                                            |
| Unk3              | -           | 3.94 (s)                                                                                            |
| L-Valine          | HMDB0000883 | 3.60 (d); 2.26 (m); 1.03 (d); 0.98 (d)                                                              |

**Supplementary Table S2.** Univariate and multivariate logistic regression. ODD ratios for the comparison between plasma samples from DS and control subjects are reported. For the calculation of the multivariate ODD ratios and respective p-values, each metabolite was considered together with age and sex variables in the analysis.

| <b>Metabolite</b> | <b>ODD ratio*</b><br>*univariate | <b>p-value*</b><br>*univariate | <b>ODD ratio**</b><br>**Adjusted for age<br>and sex | <b>p-value**</b><br>**Adjusted for age<br>and sex |
|-------------------|----------------------------------|--------------------------------|-----------------------------------------------------|---------------------------------------------------|
| Pyruvate          | 0.22                             | 0.007                          | 0.26                                                | 0.029                                             |
| Glutamine         | 0.27                             | 0.018                          | 0.27                                                | 0.027                                             |
| Creatine          | 0.16                             | 0.001                          | 0.27                                                | 0.043                                             |
| Formate           | 0.22                             | 0.007                          | 0.26                                                | 0.022                                             |
| Unk3              | 0.16                             | 0.002                          | 0.20                                                | 0.006                                             |
| Succinate         | 0.16                             | 0.002                          | 0.19                                                | 0.006                                             |
| Acetone           | 0.33                             | 0.039                          | 0.29                                                | 0.037                                             |
| Tyrosine          | 2.51                             | 0.079                          | 3.33                                                | 0.045                                             |
| Glycerol          | 0.16                             | 0.002                          | 0.15                                                | 0.004                                             |
| Acetate           | 0.33                             | 0.039                          | 0.29                                                | 0.037                                             |

**Supplementary Table S3.** List of identified metabolites in urine samples with respective  $^1\text{H}$  chemical shift values. The compound IDs derived from the Human Metabolome Database (HMDB) are provided. The multiplicity of each signal is also reported; s: singlet; d: doublet; t: triplet; dd: doublet of doublets; m: multiplet.

| Metabolite              | HMDB        | $\delta$ ( $^1\text{H}$ chemical shifts) ppm               |
|-------------------------|-------------|------------------------------------------------------------|
| 1-Methylnicotinamide    | HMDB0000699 | 9.28 (s); 8.96 (d); 8.89 (d); 8.18 (t); 4.47 (s)           |
| 2-Hydroxybutyrate       | HMDB0000008 | 3.99 (dd); 1.73 (m); 1.64 (m); 0.89 (t)                    |
| 3-Hydroxyisovalericacid | HMDB0000754 | 2.35 (s); 1.26 (s)                                         |
| 4-Hydroxyphenylacetate  | HMDB0000020 | 7.15 (d); 6.85 (d); 3.44 (s)                               |
| Acetone                 | HMDB0001659 | 2.22 (s)                                                   |
| L-Alanine               | HMDB0000161 | 3.76 (q); 1.46 (d)                                         |
| Allantoin               | HMDB0000462 | 5.38 (s)                                                   |
| L-Asparagine            | HMDB0000168 | 4.00 (dd); 2.94 (m); 2.84 (m)                              |
| Citrate                 | HMDB0000094 | 2.65 (d); 2.53 (d)                                         |
| Creatine                | HMDB0000064 | 3.92 (s); 3.02 (s)                                         |
| Creatinine              | HMDB0000562 | 4.05 (s); 3.03 (s)                                         |
| Dimethylamine           | HMDB0000087 | 2.70 (s)                                                   |
| Dimethylglycine         | HMDB0000092 | 3.71 (s); 2.91 (s)                                         |
| Ethanolamine            | HMDB0000149 | 3.81 (t); 3.13 (t)                                         |
| Formate                 | HMDB0000142 | 8.44 (s)                                                   |
| Fumarate                | HMDB0000134 | 6.51 (s)                                                   |
| L-Glutamate             | HMDB0000148 | 3.75 (dd); 2.34 (m); 2.12 (m); 2.04 (m)                    |
| L-Glutamine             | HMDB0000641 | 3.77 (t); 2.45 (m); 2.12 (m)                               |
| L-Glycine               | HMDB0000123 | 3.56 (s)                                                   |
| Glycolate               | HMDB0000115 | 3.94 (s)                                                   |
| Hippurate               | HMDB0000714 | 7.83 (m); 7.62 (m); 7.54 (m); 3.96 (d)                     |
| L-Isoleucine            | HMDB0000172 | 3.66 (d); 1.97 (m); 1.46 (m); 1.25 (m); 1.00 (d); 0.93 (t) |
| L-Leucine               | HMDB0000687 | 3.72 (m); 1.70 (m); 0.95 (t)                               |
| L-Lysine                | HMDB0000182 | 3.74 (m); 3.02 (m); 1.89 (m); 1.71 (m); 1.46 (m)           |
| Phenylacetyl glycine    | HMDB0000821 | 7.41 (m); 7.37 (m); 7.35 (m); 3.74 (d); 3.67 (s)           |
| Taurine                 | HMDB0000251 | 3.25 (t); 3.42 (t)                                         |
| Trigonelline            | HMDB0000875 | 9.11 (s); 8.82 (m); 8.01 (m); 4.43 (s)                     |
| Trimethylamine-N-Oxide  | HMDB0000925 | 3.24 (s)                                                   |
| L-Tyrosine              | HMDB0000158 | 7.17 (m); 6.88 (m); 3.92 (dd); 3.17 (dd); 3.02 (dd)        |
| L-Valine                | HMDB0000883 | 3.60 (d); 2.26 (m); 1.03 (d); 0.98 (d)                     |

**Supplementary Table S4.** Genomic location of genes encoding for the enzymes upstream or downstream of the metabolites with altered concentration levels in DS plasma or urine.

| Metabolite / KeGG Entry | Metabolic Pathways                         | Enzyme EC number (group)                        | Enzyme (Official Full Gene Name)                  | Gene Symbol    | Location |
|-------------------------|--------------------------------------------|-------------------------------------------------|---------------------------------------------------|----------------|----------|
| Acetate<br>C00033       | Glycolysis/<br>Gluconeogenesis             | 1.2.1.3<br>(Aldehyde-DH NAD <sup>+</sup> )      | Aldehyde dehydrogenase 2 family (mitochondrial)   | <i>ALDH2</i>   | 12q24.12 |
|                         |                                            |                                                 | Aldehyde dehydrogenase 1 family member B1         | <i>ALDH1B1</i> | 9p13.1   |
|                         |                                            |                                                 | Aldehyde dehydrogenase 9 family member A1         | <i>ALDH9A1</i> | 1q24.1   |
|                         |                                            |                                                 | Aldehyde dehydrogenase 3 family member A2         | <i>ALDH3A2</i> | 17p11.2  |
|                         |                                            |                                                 | Aldehyde dehydrogenase 7 family member A1         | <i>ALDH7A1</i> | 5q23.2   |
|                         | Glycolysis/<br>Gluconeogenesis             | 1.2.1.5<br>(Aldehyde-DH NAD(P) <sup>+</sup> )   | Aldehyde dehydrogenase 3 family member A1         | <i>ALDH3A1</i> | 17p11.2  |
|                         |                                            |                                                 | Aldehyde dehydrogenase 1 family member A3         | <i>ALDH1A3</i> | 15q26.3  |
|                         |                                            |                                                 | Aldehyde dehydrogenase 3 family member B1         | <i>ALDH3B1</i> | 11q13.2  |
|                         |                                            |                                                 | Aldehyde dehydrogenase 3 family member B2         | <i>ALDH3B2</i> | 11q13.2  |
|                         | Glycolysis/<br>Gluconeogenesis             | 6.2.1.1<br>(Acetyl-CoA Syntase)                 | Acyl-CoA synthetase short chain family member 2   | <i>ACSS2</i>   | 20q11.22 |
|                         |                                            |                                                 | Acyl-CoA synthetase short chain family member 1   | <i>ACSS1</i>   | 20p11.21 |
|                         | Pyruvate metabolism                        | 3.1.2.1                                         | Acyl-CoA thioesterase 12                          | <i>ACOT12</i>  | 5q14.1   |
| Pyruvate metabolism     | 3.6.1.7<br>(Acylphosphatase)               | Acylphosphatase 1                               | <i>ACYP1</i>                                      | 14q24.3        |          |
|                         |                                            | Acylphosphatase 2                               | <i>ACYP2</i>                                      | 2p16.2         |          |
| Acetoacetate<br>C00164  | Tyrosine metabolism                        | 3.7.1.2                                         | Fumarylacetoacetate hydrolase                     | <i>FAH</i>     | 15q25.1  |
|                         | Synthesis and degradation of ketone bodies | 1.1.1.30<br>(3-Hydroxybutyrate DH)              | 3-hydroxybutyrate dehydrogenase 2                 | <i>BDH2</i>    | 4q24     |
|                         | Butanoate metabolism                       |                                                 | 3-hydroxybutyrate dehydrogenase 1                 | <i>BDH1</i>    | 3q29     |
|                         | Synthesis and degradation of ketone bodies | 4.1.3.4<br>(Hydroxy-3-methylglutaryl-CoA Lyase) | 3-hydroxymethyl-3-methylglutaryl-CoA lyase        | <i>HMGCL</i>   | 1p36.11  |
|                         | Valine, leucine and isoleucine degradation |                                                 |                                                   |                |          |
|                         | Butanoate metabolism                       |                                                 | 3-hydroxymethyl-3-methylglutaryl-CoA lyase like 1 | <i>HMGCLL1</i> | 6p12.1   |
|                         | Synthesis and degradation of ketone bodies | 2.8.3.5<br>(3-Oxoacid CoA-Transferase)          | 3-oxoacid CoA-transferase 1                       | <i>OXCT1</i>   | 5p13.1   |
|                         | Valine, leucine and isoleucine degradation |                                                 |                                                   |                |          |
|                         | Butanoate metabolism                       |                                                 | 3-oxoacid CoA-transferase 2                       | <i>OXCT2</i>   | 1p34.2   |

|                                           |                                             |                                                                     |                                                          |                 |          |
|-------------------------------------------|---------------------------------------------|---------------------------------------------------------------------|----------------------------------------------------------|-----------------|----------|
|                                           | Valine, leucine and isoleucine degradation  | 6.2.1.16                                                            | Acetoacetyl-CoA synthetase                               | <i>AACS</i>     | 12q24.31 |
|                                           | Butanoate metabolism                        |                                                                     |                                                          |                 |          |
| Citrate<br>C00158                         | Citrate cycle (TCA cycle)                   | 2.3.3.1                                                             | citrate synthase                                         | <i>CS</i>       | 12q13.3  |
|                                           | Glyoxylate and dicarboxylate metabolism     |                                                                     |                                                          |                 |          |
|                                           | Citrate cycle (TCA cycle)                   | 2.3.3.8                                                             | ATP citrate lyase                                        | <i>ACLY</i>     | 17q21.2  |
|                                           | Citrate cycle (TCA cycle)                   | 4.2.1.3<br>(Aconitase)                                              | Aconitase 1                                              | <i>ACO1</i>     | 9p21.1   |
|                                           | Glyoxylate and dicarboxylate metabolism     |                                                                     | Aconitase 2                                              | <i>ACO2</i>     | 22q13.2  |
|                                           | Alanine, aspartate and glutamate metabolism | 6.3.1.17                                                            | Ribosomal modification protein rimK like family member B | <i>RIMKLB</i>   | 12p13.31 |
| Creatine<br>C00300                        | Glycine, serine and threonine metabolism    | 2.1.1.2                                                             | guanidinoacetate N-methyltransferase                     | <i>GAMT</i>     | 19p13.3  |
|                                           | Arginine and proline metabolism             |                                                                     |                                                          |                 |          |
|                                           | Arginine and proline metabolism             | 2.7.3.2<br>(Creatine Kinase)                                        | Creatine kinase B                                        | <i>CKB</i>      | 14q32.33 |
|                                           |                                             |                                                                     | Creatine kinase, M-type                                  | <i>CKM</i>      | 19q13.32 |
|                                           |                                             |                                                                     | Creatine kinase, mitochondrial 1B                        | <i>CKMT1B</i>   | 15q15.3  |
|                                           |                                             |                                                                     | Creatine kinase, mitochondrial 2                         | <i>CKMT2</i>    | 5q14.1   |
| Creatine kinase, mitochondrial 1A         | <i>CKMT1A</i>                               | 15q15.3                                                             |                                                          |                 |          |
| Ethanolamine<br>C00189                    | Glycerophospholipid metabolism              | 3.1.3.75                                                            | Phosphoethanolamine/Phosphocholine phosphatase           | <i>PHOSPHOI</i> | 17q21.32 |
|                                           | Glycerophospholipid metabolism              | 2.7.1.82<br>(Ethanolamine kinase)                                   | Choline kinase alpha                                     | <i>CHKA</i>     | 11q13.2  |
|                                           |                                             |                                                                     | Choline kinase beta                                      | <i>CHKB</i>     | 22q13.33 |
|                                           |                                             |                                                                     | Ethanolamine kinase 2                                    | <i>ETNK2</i>    | 1q32.1   |
|                                           |                                             |                                                                     | Ethanolamine kinase 1                                    | <i>ETNK1</i>    | 12p12.1  |
| Formate<br>C00058                         | Glyoxylate and dicarboxylate metabolism     | 3.5.1.9                                                             | Arylformamidase                                          | <i>AFMID</i>    | 17q25.5  |
| Fumarate<br>C00122                        | Citrate cycle (TCA cycle)                   | 4.2.1.2                                                             | Fumarate hydratase                                       | <i>FH</i>       | 1q43     |
|                                           | Pyruvate metabolism                         |                                                                     |                                                          |                 |          |
|                                           | Citrate cycle (TCA cycle)                   | 1.3.5.1<br>(Succinate dehydrogenase complex flavoprotein subunit A) | Succinate dehydrogenase complex flavoprotein subunit A   | <i>SDHA</i>     | 5p15.33  |
|                                           |                                             |                                                                     | Succinate dehydrogenase complex iron sulfur subunit B    | <i>SDHB</i>     | 1p36.13  |
|                                           | Oxidative phosphorylation                   |                                                                     | Succinate dehydrogenase complex subunit C                | <i>SDHC</i>     | 1q23.3   |
| Succinate dehydrogenase complex subunit D |                                             |                                                                     | <i>SDHD</i>                                              | 11q23.1         |          |



|                                          |                                             |                                                             |                                                   |                |          |
|------------------------------------------|---------------------------------------------|-------------------------------------------------------------|---------------------------------------------------|----------------|----------|
|                                          | Arginine biosynthesis                       | 4.3.2.1                                                     | Argininosuccinate lyase                           | <i>ASL</i>     | 7q11.21  |
|                                          | Alanine, aspartate and glutamate metabolism |                                                             |                                                   |                |          |
|                                          | Alanine, aspartate and glutamate metabolism | 4.3.2.2                                                     | Adenylosuccinate lyase                            | <i>ADSL</i>    | 22q13.1  |
|                                          | Tyrosine metabolism                         | 3.7.1.2                                                     | Fumarylacetoacetate hydrolase                     | <i>FAH</i>     | 15q25.1  |
|                                          | Tyrosine metabolism                         | 3.7.1.5                                                     | Fumarylacetoacetate hydrolase domain containing 1 | <i>FAHDI</i>   | 16p13.3  |
| Glycerol C00116                          | Galactose metabolism                        | 3.2.1.22                                                    | Galactosidase alpha                               | <i>GLA</i>     | Xq22.1   |
|                                          | Glycerolipid metabolism                     | 1.1.1.2                                                     | Aldo-keto reductase family 1 member A1            | <i>AKR1A1</i>  | 1p34.1   |
|                                          | Glycerolipid metabolism                     | 1.1.1.21 (Aldehyde Reductase)                               | Aldo-keto reductase family 1 member B             | <i>AKR1B1</i>  | 7q33     |
|                                          |                                             |                                                             | Aldo-keto reductase family 1 member B10           | <i>AKR1B10</i> | 7q33     |
|                                          | Glycerolipid metabolism                     | 2.7.1.30 (Glycerol Kinase)                                  | Glycerol kinase                                   | <i>GK</i>      | Xp21.2   |
|                                          |                                             |                                                             | Glycerol kinase 2                                 | <i>GK2</i>     | 4q21.21  |
| Glycerolipid metabolism                  | 3.1.1.23                                    | Acylglycerol lipase                                         | <i>MGLL</i>                                       | 3q21.3         |          |
| Glycine C00037                           | Primary bile acid biosynthesis              | 2.3.1.65                                                    | Bile acid-CoA:amino acid N-acyltransferase        | <i>BAAT</i>    | 9q31.1   |
|                                          | Glyoxylate and dicarboxylate metabolism     | 1.8.1.4                                                     | Dihydrolipoamide dehydrogenase                    | <i>DLD</i>     | 7q31.1   |
|                                          | Aminoacyl-tRNA biosynthesis                 | 6.1.1.14                                                    | Glycyl-tRNA synthetase                            | <i>GARS</i>    | 7p14.3   |
|                                          | Glutathione metabolism                      | 3.4.11.2                                                    | Alanyl aminopeptidase, membrane                   | <i>ANPEP</i>   | 15q26.1  |
|                                          | Glutathione metabolism                      | 3.4.11.1<br>3.4.11.5                                        | Leucine aminopeptidase 3                          | <i>LAP3</i>    | 4p15.32  |
|                                          |                                             |                                                             |                                                   |                |          |
|                                          | Glutathione metabolism                      | 6.3.2.3                                                     | Glutathione synthetase                            | <i>GSS</i>     | 20q11.22 |
|                                          | Glycine, serine and threonine metabolism    | 2.6.1.44<br>2.6.1.45 (Alanine-glyoxylate aminotransaminase) | Alanine-glyoxylate aminotransferase               | <i>AGXT</i>    | 2q37.3   |
|                                          |                                             |                                                             | Alanine-glyoxylate aminotransferase 2             | <i>AGXT2</i>   | 5p13.2   |
|                                          | Glycine, serine and threonine metabolism    | 2.1.2.1 (serine hydroxymethyltransferase)                   | Serine hydroxymethyltransferase 1                 | <i>SHMT1</i>   | 17p11.2  |
|                                          |                                             |                                                             | Serine hydroxymethyltransferase 2                 | <i>SHMT2</i>   | 12q13.3  |
|                                          | Glycine, serine and threonine metabolism    | 1.5.3.1                                                     | Pipecolic acid and sarcosine oxidase              | <i>PIPOX</i>   | 17q11.2  |
|                                          | Glycine, serine and threonine metabolism    | 1.5.8.3                                                     | Sarcosine dehydrogenase                           | <i>SARDH</i>   | 9q34.2   |
| Glycine, serine and threonine metabolism | 2.1.1.20                                    | Glycine N-methyltransferase                                 | <i>GNMT</i>                                       | 6p21.1         |          |

|                                        |                                             |                                                           |                                             |                |          |
|----------------------------------------|---------------------------------------------|-----------------------------------------------------------|---------------------------------------------|----------------|----------|
|                                        | Glycine, serine and threonine metabolism    | 2.3.1.29                                                  | Glycine C-acetyltransferase                 | <i>GCAT</i>    | 22q13.1  |
|                                        | Glycine, serine and threonine metabolism    | 1.4.3.3                                                   | D-amino acid oxidase                        | <i>DAO</i>     | 12q24.11 |
|                                        | Glycine, serine and threonine metabolism    | 1.4.4.2                                                   | Glycine decarboxylase                       | <i>GLDC</i>    | 9p24.1   |
|                                        | Glycine, serine and threonine metabolism    | 2.3.1.37<br>(5'-aminolevulinate synthase)                 | 5'-aminolevulinate synthase 1               | <i>ALAS1</i>   | 3p21.2   |
|                                        | Porphyrin and chlorophyll metabolism        |                                                           | 5'-aminolevulinate synthase 2               | <i>ALAS2</i>   | Xp11.21  |
|                                        | Glycine, serine and threonine metabolism    | 2.1.4.1                                                   | Glycine amidinotransferase                  | <i>GATM</i>    | 15q21.1  |
| Hippurate C01586                       | Phenylalanine metabolism                    | 2.3.1.71                                                  | Glycine-N-acyltransferase                   | <i>GLYAT</i>   | 11q12.1  |
| Lactate C00186                         | Glycolysis/<br>Gluconeogenesis              | 1.1.1.27<br>(Lactate dehydrogenase)                       | Lactate dehydrogenase A like 6A             | <i>LDHAL6A</i> | 11p15.1  |
|                                        |                                             |                                                           | Lactate dehydrogenase A                     | <i>LDHA</i>    | 11p15.1  |
|                                        | Lactate dehydrogenase B                     |                                                           | <i>LDHB</i>                                 | 12p12.1        |          |
|                                        | Lactate dehydrogenase C                     |                                                           | <i>LDHC</i>                                 | 11p15.1        |          |
|                                        | Pyruvate metabolism                         |                                                           | Lactate dehydrogenase A like 6B             | <i>LDHAL6B</i> | 15q22.2  |
| L-Glutamic acid C00025                 | Glutathione metabolism                      | 2.3.2.2<br>3.4.19.13<br>(gamma-glutamyltransferase)       | Gamma-glutamyltransferase 6                 | <i>GGT6</i>    | 17p13.2  |
|                                        |                                             |                                                           | Gamma-glutamyltransferase 1                 | <i>GGT1</i>    | 22q11.23 |
|                                        |                                             |                                                           | Gamma-glutamyltransferase 7                 | <i>GGT7</i>    | 20q11.22 |
|                                        |                                             |                                                           | Gamma-glutamyltransferase 5                 | <i>GGT5</i>    | 22q11.23 |
|                                        | Alanine, aspartate and glutamate metabolism | 3.5.1.2<br>(glutaminase)                                  | Glutaminase                                 | <i>GLS</i>     | 2q32.2   |
|                                        | D-glutamine and D-glutamate metabolism      |                                                           | Glutaminase 2                               | <i>GLS2</i>    | 12q13.3  |
|                                        | Glutathione metabolism                      | 6.3.3.2<br>6.3.2.2<br>(glutamate-cysteine ligase subunit) | Glutamate-cysteine ligase catalytic subunit | <i>GCLC</i>    | 6p12.1   |
|                                        |                                             |                                                           | Glutamate-cysteine ligase modifier subunit  | <i>GCLM</i>    | 1p22.1   |
|                                        | Glutathione metabolism                      | 3.5.2.9                                                   | 5-oxoprolinase (ATP-hydrolysing)            | <i>OPLAH</i>   | 8q24.3   |
|                                        | Arginine biosynthesis                       | 1.4.1.3<br>(Glutamate DH NAD (P)+)00                      | Glutamate dehydrogenase 1                   | <i>GLUD1</i>   | 10q23.2  |
|                                        | Alanine, aspartate and glutamate metabolism |                                                           |                                             |                |          |
| D-glutamine and D-glutamate metabolism | Glutamate dehydrogenase 2                   |                                                           | <i>GLUD2</i>                                | Xq24           |          |

|                                         |                                             |                                                |                                              |                 |          |
|-----------------------------------------|---------------------------------------------|------------------------------------------------|----------------------------------------------|-----------------|----------|
|                                         | Nitrogen metabolism                         |                                                |                                              |                 |          |
|                                         | Arginine biosynthesis                       | 2.6.1.1<br>(glutamic-oxaloacetic transaminase) | Glutamic-oxaloacetic transaminase 1          | <i>GOT1</i>     | 10q24.2  |
|                                         |                                             |                                                | Glutamic-oxaloacetic transaminase 2          | <i>GOT2</i>     | 16q21    |
|                                         | Arginine biosynthesis                       | 2.6.1.2<br>(glutamic-pyruvic transaminase)     | Glutamic-pyruvic transaminase                | <i>GPT</i>      | 8q24.3   |
|                                         |                                             |                                                | Glutamic-pyruvic transaminase 2              | <i>GPT2</i>     | 16q11.2  |
|                                         | Arginine biosynthesis                       | 2.3.1.1                                        | N-acetylglutamate synthase                   | <i>NAGS</i>     | 17q21.31 |
|                                         | Glyoxylate and dicarboxylate metabolism     | 6.3.1.2                                        | Glutamate-ammonia ligase                     | <i>GLUL</i>     | 1q25.3   |
|                                         | Alanine, aspartate and glutamate metabolism |                                                |                                              |                 |          |
|                                         | Alanine, aspartate and glutamate metabolism | 1.2.1.88                                       | Aldehyde dehydrogenase 4 family member A1    | <i>ALDH4A1</i>  | 1p36.13  |
|                                         | Arginine and proline metabolism             |                                                |                                              |                 |          |
|                                         | Alanine, aspartate and glutamate metabolism | 4.1.1.15<br>(Glutamate decarboxylase)          | Glutamate decarboxylase 1                    | <i>GAD1</i>     | 2q31.1   |
|                                         | Butanoate metabolism                        |                                                | Glutamate decarboxylase 2                    | <i>GAD2</i>     | 10p12.1  |
|                                         | Arginine and proline metabolism             | 2.7.2.11                                       | Aldehyde dehydrogenase 18 family member A1   | <i>ALDH18A1</i> | 10q24.1  |
|                                         | Histidine metabolism                        | 2.1.2.5                                        | Formimidoyltransferase cyclodeaminase        | <i>FTCD</i>     | 21q22.3  |
|                                         | Porphyrin and chlorophyll metabolism        | 6.1.1.17                                       | Glutamyl-tRNA synthetase                     | <i>EARS2</i>    | 16p12.2  |
|                                         | Aminoacyl-tRNA biosynthesis                 |                                                | Bifunctional glutamyl/prolyl-tRNA synthetase | <i>EPRS</i>     | 1q41     |
| L-Glutamine<br>C00064                   | Arginine biosynthesis                       | 3.5.1.2<br>(Glutaminase)                       | Glutaminase                                  | <i>GLS</i>      | 2q32.2   |
|                                         | Alanine, aspartate and glutamate metabolism |                                                |                                              |                 |          |
|                                         | D-glutamine and D-glutamate metabolism      |                                                | Glutaminase 2                                | <i>GLS2</i>     | 12q13.3  |
|                                         | Arginine biosynthesis                       | 6.3.1.2                                        | Glutamate-ammonia ligase                     | <i>GLUL</i>     | 1q25.3   |
|                                         | Alanine, aspartate and glutamate metabolism |                                                |                                              |                 |          |
| Glyoxylate and dicarboxylate metabolism |                                             |                                                |                                              |                 |          |

|                                            |                                             |                                                          |                                                                                  |              |          |
|--------------------------------------------|---------------------------------------------|----------------------------------------------------------|----------------------------------------------------------------------------------|--------------|----------|
|                                            | Nitrogen metabolism                         |                                                          |                                                                                  |              |          |
|                                            | Alanine, aspartate and glutamate metabolism | 2.6.1.16<br>(Glucosamine-Fructose 6P-Amino-Transferase)  | Glutamine-fructose-6-phosphate transaminase 1                                    | <i>GFPT1</i> | 2p13.3   |
|                                            |                                             |                                                          | Glutamine-fructose-6-phosphate transaminase 2                                    | <i>GFPT2</i> | 5q35.3   |
|                                            | Purine metabolism                           | 2.4.2.14                                                 | Phosphoribosyl pyrophosphate amidotransferase                                    | <i>PPAT</i>  | 4q12     |
|                                            | Alanine, aspartate and glutamate metabolism |                                                          |                                                                                  |              |          |
|                                            | Aminoacyl-tRNA biosynthesis                 | 6.1.1.18                                                 | Glutaminyl-tRNA synthetase                                                       | <i>QARS</i>  | 3p21.31  |
|                                            | Alanine, aspartate and glutamate metabolism | 6.3.5.5                                                  | Carbamoyl-phosphate synthetase 2, aspartate Transcarbamylase, and dihydroorotase | <i>CAD</i>   | 2p23.3   |
| L-Isoleucine<br>C00407                     | Valine, leucine and isoleucine degradation  | 1.4.3.1                                                  | Interleukin 4 induced 1                                                          | <i>IL4I1</i> | 19q13.33 |
|                                            | Valine, leucine and isoleucine degradation  | 2.6.1.42<br>(Branched chain amino acid transaminase)     | Branched chain amino acid transaminase 1                                         | <i>BCAT1</i> | 12p12.1  |
|                                            | Valine, leucine and isoleucine biosynthesis |                                                          | Branched chain amino acid transaminase 2                                         | <i>BCAT2</i> | 19q13.33 |
|                                            | Aminoacyl-tRNA biosynthesis                 | 6.1.1.5<br>(Isoleucyl-tRNA synthetase)                   | Isoleucyl-tRNA synthetase                                                        | <i>IARS</i>  | 9q22.31  |
| Isoleucyl-tRNA synthetase 2, mitochondrial |                                             |                                                          | <i>IARS2</i>                                                                     | 1q41         |          |
| L-Leucine<br>C00123                        | Valine, leucine and isoleucine degradation  | 2.6.1.42<br>(Branched-chain Aminoacid-Amino-Transferase) | Branched chain amino acid transaminase 1                                         | <i>BCAT1</i> | 12p12.1  |
|                                            | Valine, leucine and isoleucine biosynthesis |                                                          | Branched chain amino acid transaminase 2                                         | <i>BCAT2</i> | 19q13.33 |
|                                            | Aminoacyl-tRNA biosynthesis                 | 6.1.1.4                                                  | Leucyl-tRNA synthetase 2, mitochondrial                                          | <i>LARS2</i> | 3p21.31  |
| L-Lysine<br>C00047                         | Aminoacyl-tRNA biosynthesis                 | 6.1.1.6                                                  | Lysyl-tRNA synthetase                                                            | <i>KARS</i>  | 16q23.1  |
|                                            | Biotin metabolism                           | 3.5.1.12                                                 | Biotinidase                                                                      | <i>BTD</i>   | 3p25.1   |
|                                            | Lysine degradation                          | 1.5.1.8                                                  | Alpha-amino adipic semialdehyde synthase                                         | <i>AASS</i>  | 7q31.32  |
| Phenylacetyl-glycine<br>C05598             | Phenylalanine metabolism                    | 2.3.1.13                                                 | Glycine-N-acyltransferase                                                        | <i>GLYAT</i> | 11q12.1  |
| Pyruvate<br>C00022                         | Cysteine and methionine metabolism          | 2.8.1.2<br>(sulfurtransferase)                           | Mercaptopyruvate sulfurtransferase                                               | <i>MPST</i>  | 22q12.3  |
|                                            |                                             |                                                          | Thiosulfate sulfurtransferase                                                    | <i>TST</i>   | 22q12.3  |
|                                            | Alanine, aspartate and glutamate metabolism | 2.6.1.2<br>(glutamic-pyruvic transaminase)               | Glutamic-pyruvic transaminase                                                    | <i>GPT</i>   | 8q24.3   |
|                                            |                                             |                                                          | Glutamic-pyruvic transaminase 2                                                  | <i>GPT2</i>  | 16q11.2  |
|                                            | Alanine, aspartate and glutamate metabolism | 2.6.1.44<br>(alanine-glyoxylate aminotransferase)        | Alanine-glyoxylate aminotransferase                                              | <i>AGXT</i>  | 2q37.3   |
|                                            |                                             |                                                          | Alanine-glyoxylate aminotransferase 2                                            | <i>AGXT2</i> | 5p13.2   |
| Cysteine and                               | 4.4.1.1                                     | Cystathionine gamma-lyase                                | <i>CTH</i>                                                                       | 1p31.1       |          |

|                                           |                                             |                                                   |                                                        |                |         |
|-------------------------------------------|---------------------------------------------|---------------------------------------------------|--------------------------------------------------------|----------------|---------|
| methionine metabolism                     |                                             |                                                   |                                                        |                |         |
| Glycine, serine and threonine metabolism  | 4.3.1.17                                    | Serine dehydratase                                | <i>SDS</i>                                             | 12q24.13       |         |
|                                           | 4.3.1.19<br>(serine dehydratase)            | Serine dehydratase like                           | <i>SDSL</i>                                            | 12q24.13       |         |
| Arginine and proline metabolism           | 4.1.3.16                                    | 4-hydroxy-2-oxoglutarate aldolase 1               | <i>HOGA1</i>                                           | 10q24.2        |         |
| Glycoxylate and dicarboxylate metabolism  |                                             |                                                   |                                                        |                |         |
| Tyrosine metabolism                       | 3.7.1.5                                     | Fumarylacetoacetate hydrolase domain containing 1 | <i>FAHDI</i>                                           | 16p13.3        |         |
| Glycolysis / Gluconeogenesis              | 1.1.1.27<br>(L-Lactate DH)                  | Lactate dehydrogenase A like 6A                   | <i>LDH6A</i>                                           | 11p15.1        |         |
|                                           |                                             | Lactate dehydrogenase A                           | <i>LDHA</i>                                            | 11p15.1        |         |
| Lactate dehydrogenase B                   |                                             | <i>LDHB</i>                                       | 12p12.1                                                |                |         |
| Lactate dehydrogenase C                   |                                             | <i>LDHC</i>                                       | 11p15.1                                                |                |         |
| Lactate dehydrogenase A like 6B           |                                             | <i>LDH6B</i>                                      | 15q22.2                                                |                |         |
| Pyruvate metabolism                       |                                             |                                                   |                                                        |                |         |
| Glycolysis / Gluconeogenesis              | 2.7.1.40<br>(Pyruvate Kinase)               | Pyruvate kinase, liver and RBC                    | <i>PKLR</i>                                            | 1q22           |         |
| Pyruvate metabolism                       |                                             | Pyruvate kinase, muscle                           | <i>PKM</i>                                             | 15q23          |         |
| Glycolysis / Gluconeogenesis              | 1.2.4.1<br>(Pyruvate DH)                    | Pyruvate dehydrogenase alpha 1                    | <i>PDHA1</i>                                           | Xp22.12        |         |
| Citrate cycle (TCA cycle)                 |                                             | Pyruvate dehydrogenase alpha 2                    | <i>PDHA2</i>                                           | 4q22.3         |         |
| Pyruvate metabolism                       |                                             | Pyruvate dehydrogenase (lipoamide) beta           | <i>PDHB</i>                                            | 3p14.3         |         |
| Pyruvate metabolism                       | 1.1.2.4                                     | Lactate dehydrogenase D                           | <i>LDHD</i>                                            | 16q23.1        |         |
| Citrate cycle (TCA cycle)                 | 6.4.1.1                                     | Pyruvate Carboxylase                              | <i>PC</i>                                              | 11q13.2        |         |
| Pyruvate metabolism                       |                                             |                                                   |                                                        |                |         |
| Pyruvate metabolism                       | 1.1.1.38<br>(malic enzyme)                  | Malic enzyme 2                                    | <i>ME2</i>                                             | 18q21.2        |         |
| Pyruvate metabolism                       | 1.1.1.40<br>(malic enzyme)                  | Malic enzyme 3                                    | <i>ME3</i>                                             | 11q14.2        |         |
|                                           |                                             | Malic enzyme 1                                    | <i>ME1</i>                                             | 6q14.2         |         |
| Succinate C00042                          | Alanine, aspartate and glutamate metabolism | 1.2.1.24                                          | Aldehyde dehydrogenase 5 family member A1              | <i>ALDH5A1</i> | 6p22.3  |
|                                           | Butanoate metabolism                        |                                                   |                                                        |                |         |
|                                           | Citrate cycle (TCA cycle)                   | 1.3.5.1<br>(Succinate DH (ubiquinone))            | Succinate dehydrogenase complex flavoprotein subunit A | <i>SDHA</i>    | 5p15.33 |
|                                           |                                             |                                                   | Succinate dehydrogenase complex iron sulfur subunit B  | <i>SDHB</i>    | 1p36.13 |
|                                           | Oxidative phosphorylation                   |                                                   | Succinate dehydrogenase complex subunit C              | <i>SDHC</i>    | 1q23.3  |
| Succinate dehydrogenase complex subunit D |                                             |                                                   | <i>SDHD</i>                                            | 11q23.1        |         |
| Citrate cycle (TCA cycle)                 | 6.2.1.4                                     | Succinate-CoA ligase GDP-forming beta subunit     | <i>SUCLG2</i>                                          | 3p14.1         |         |

|                     |                                                     |                                                                |                                               |               |              |
|---------------------|-----------------------------------------------------|----------------------------------------------------------------|-----------------------------------------------|---------------|--------------|
|                     | Propanoate metabolism                               |                                                                |                                               |               |              |
|                     | Citrate cycle (TCA cycle)                           | 6.2.1.5<br>(Succinyl-CoA Synthase $\alpha$ - $\beta$ subunits) | Succinate-CoA ligase alpha subunit            | <i>SUCLG1</i> | 2p11.2       |
|                     | Propanoate metabolism                               |                                                                | Succinate-CoA ligase ADP-forming beta subunit | <i>SUCLA2</i> | 13q14.2      |
| Threonine<br>C00188 | Glycine, serine and threonine metabolism            | 4.3.1.19<br>(Serine dehydratase)                               | Serine dehydratase                            | <i>SDS</i>    | 12q24.13     |
|                     | Valine, leucine and isoleucine biosynthesis         |                                                                | Serine dehydratase like                       | <i>SDSL</i>   | 12q24.13     |
|                     | Aminoacyl-tRNA biosynthesis                         | 6.1.1.3<br>(Threonyl-tRNA synthetase)                          | Threonyl-tRNA synthetase like 2               | <i>TARSL2</i> | 15q26.3      |
|                     |                                                     |                                                                | Threonyl-tRNA synthetase                      | <i>TARS</i>   | 5p13.3       |
|                     |                                                     |                                                                | Threonyl-tRNA synthetase 2, mitochondrial     | <i>TARS2</i>  | 1q21.2       |
| Tyrosine<br>C00082  | Aminoacyl-tRNA biosynthesis                         | 6.1.1.1<br>(tyrosyl-tRNA synthetase)                           | Tyrosyl-tRNA synthetase                       | <i>YARS</i>   | 1p35.1       |
|                     |                                                     |                                                                | Tyrosyl-tRNA synthetase 2                     | <i>YARS2</i>  | 12p11.21     |
|                     | Tyrosine metabolism                                 | 2.6.1.1<br>(glutamic-oxaloacetic transaminase)                 | Glutamic-oxaloacetic transaminase 1           | <i>GOT1</i>   | 10q24.2      |
|                     | Phenylalanine, tyrosine and tryptophan biosynthesis |                                                                | Glutamic-oxaloacetic transaminase 2           | <i>GOT2</i>   | 16q21        |
|                     | Ubiquinone and other terpenoid-quinone biosynthesis | 2.6.1.5                                                        | Tyrosine aminotransferase                     | <i>TAT</i>    | 16q22.2      |
|                     | Tyrosine metabolism                                 |                                                                |                                               |               |              |
|                     | Phenylalanine, tyrosine and tryptophan biosynthesis |                                                                |                                               |               |              |
|                     | Tyrosine metabolism                                 | 1.4.3.2                                                        | Interleukin 4 induced 1                       | <i>IL4I1</i>  | 19q13.33     |
|                     | Phenylalanine, tyrosine and tryptophan biosynthesis |                                                                |                                               |               |              |
|                     | Tyrosine metabolism                                 | 1.14.18.1                                                      | Tyrosinase                                    | <i>TYR</i>    | 11q14.3      |
|                     | Tyrosine metabolism                                 | 1.14.16.2                                                      | Tyrosine hydroxylase                          | <i>TH</i>     | 11p15.5      |
|                     | Tyrosine metabolism                                 | 4.1.1.28                                                       | Dopa decarboxylase                            | <i>DDC</i>    | 7p12.2-p12.1 |
|                     | Tyrosine metabolism                                 | 1.11.1.8                                                       | Thyroid peroxidase                            | <i>TPO</i>    | 2p25.3       |
|                     | Phenylalanine metabolism                            | 1.14.16.1                                                      | Phenylalanine hydroxylase                     | <i>PAH</i>    | 12q23.2      |
|                     | Phenylalanine, tyrosine and tryptophan biosynthesis |                                                                |                                               |               |              |
